# Supplementary material for: Developmental Screening Tools Used with First Nations Populations: A Systematic Review
Source: MDPI journal article supplement (doi:10.3390/ijerph192315627), 2022-11-24
Supplement: s1 [file s1]

## Supplementary Tables

Supplementary Table S1

*Search strategy and search terms*

| Database         | Date | Search                                                                                                                                                                                                                                                                                                                                                                                                                                                                                                                                                                                                                                                                                                                                                                                                                                                                                                                                                                                                                                                                                                                                                                                                                                                                                                                                                                                                                                                                                                                                                                                                                                      |
|------------------|------|---------------------------------------------------------------------------------------------------------------------------------------------------------------------------------------------------------------------------------------------------------------------------------------------------------------------------------------------------------------------------------------------------------------------------------------------------------------------------------------------------------------------------------------------------------------------------------------------------------------------------------------------------------------------------------------------------------------------------------------------------------------------------------------------------------------------------------------------------------------------------------------------------------------------------------------------------------------------------------------------------------------------------------------------------------------------------------------------------------------------------------------------------------------------------------------------------------------------------------------------------------------------------------------------------------------------------------------------------------------------------------------------------------------------------------------------------------------------------------------------------------------------------------------------------------------------------------------------------------------------------------------------|
| <b>PsychInfo</b> |      | (noft("child" OR "infant*" OR "baby" OR "preschool") AND noft("milestone*" AND "surveillance" OR ("screening tool" OR "screening tools") OR "screening measure*" OR "screening assessment*")) AND noft("first nations" OR "indigenous" OR "Aboriginal" OR "native" OR "Torres Strait Islander*") )                                                                                                                                                                                                                                                                                                                                                                                                                                                                                                                                                                                                                                                                                                                                                                                                                                                                                                                                                                                                                                                                                                                                                                                                                                                                                                                                          |
| <b>Embase</b>    |      | 1 child/ 2214799<br>2 infant.mp. [mp=title, abstract, heading word, drug trade name, original title, device manufacturer, drug manufacturer, device trade name, keyword heading word, floating subheading word, candidate term word] 923253<br>3 baby.mp. [mp=title, abstract, heading word, drug trade name, original title, device manufacturer, drug manufacturer, device trade name, keyword heading word, floating subheading word, candidate term word] 83245<br>4 preschool.mp. [mp=title, abstract, heading word, drug trade name, original title, device manufacturer, drug manufacturer, device trade name, keyword heading word, floating subheading word, candidate term word] 684845<br>5 1 or 2 or 3 or 42897745<br>6 milestone.mp. [mp=title, abstract, heading word, drug trade name, original title, device manufacturer, drug manufacturer, device trade name, keyword heading word, floating subheading word, candidate term word] 8878<br>7 (surveillance or screening tool or screening measure or screening assessment).mp. [mp=title, abstract, heading word, drug trade name, original title, device manufacturer, drug manufacturer, device trade name, keyword heading word, floating subheading word, candidate term word] 386010<br>8 (first nations or indigenous or Aboriginal or native or Torres Strait Islander).mp. [mp=title, abstract, heading word, drug trade name, original title, device manufacturer, drug manufacturer, device trade name, keyword heading word, floating subheading word, candidate term word] 338191<br>9 5 and 6 and 7 and 8 1<br>10 limit 9 to (human and english language) 1 |
| <b>PubMed</b>    |      | Search: ((((((("child") OR ("infant") OR ("baby") OR ("preschool") AND ("milestone") AND (surveillance) OR ("screening tool*") OR ("screening measure") OR ("screening assessment") AND ((clinicalstudy[Filter] OR clinicaltrial[Filter] OR observationalstudy[Filter] OR randomizedcontrolledtrial[Filter]) AND (humans[Filter]) AND (2014/1/1:2022/5/18[pdat]) AND (english[Filter]) AND (allinfant[Filter] OR infant[Filter] OR                                                                                                                                                                                                                                                                                                                                                                                                                                                                                                                                                                                                                                                                                                                                                                                                                                                                                                                                                                                                                                                                                                                                                                                                          |

|  |  |                                                                                                                                                                                                                                                                                                                             |
|--|--|-----------------------------------------------------------------------------------------------------------------------------------------------------------------------------------------------------------------------------------------------------------------------------------------------------------------------------|
|  |  | preschoolchild[Filter])) AND (first nations)) OR (indigenous)) OR (Aboriginal)) OR (native)) OR (Torres Strait Islander) Filters: Case Reports, Clinical Study, Clinical Trial, Observational Study, Randomized Controlled Trial, Humans, English, Infant: birth-23 months, Infant: 1-23 months, Preschool Child: 2-5 years |
|--|--|-----------------------------------------------------------------------------------------------------------------------------------------------------------------------------------------------------------------------------------------------------------------------------------------------------------------------------|
